# Supplementary material for: Early anterior cingulate involvement is seen in presymptomatic MAPT P301L mutation carriers
Source: PubMed Central journal article supplement (PMC7876816; doi:10.1186/s13195-021-00777-9), 2021-02-10

A) SUVR

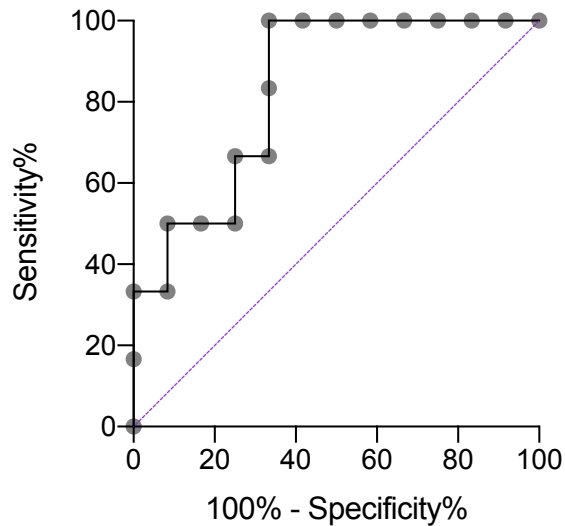

B) Volume

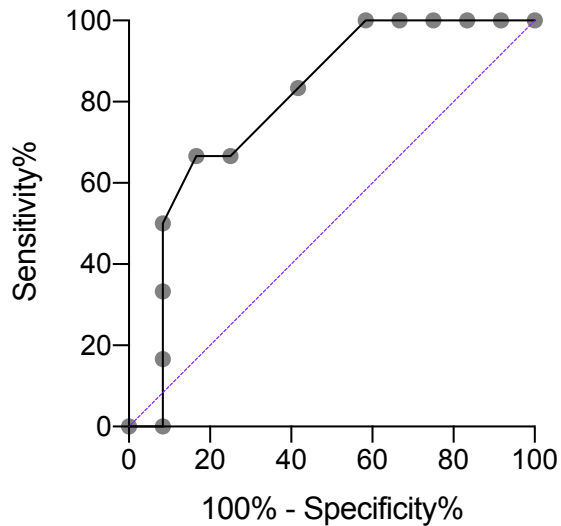

C) SUVR &amp; volume

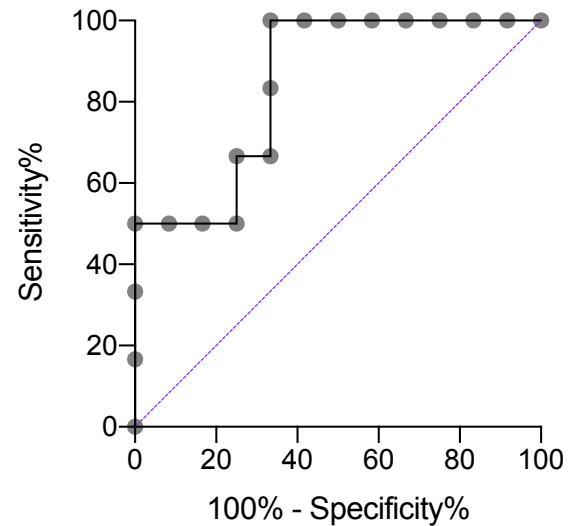

Supplement: 13195_2021_777_MOESM1_ESM.pdf [file 13195_2021_777_MOESM1_ESM.pdf]
